# Supplementary material for: A flexible ligand and halogen engineering enable one phosphor-based full-color persistent luminescence in hybrid perovskitoids
Source: Royal Society of Chemistry journal article supplement (doi:10.1039/d3sc06845e), 2024-01-01
Supplement: d3sc06845e1.pdf [file d3sc06845e1.pdf]

## Supporting Information

### **Flexible Ligand and Halogen Engineering Enable One Phosphor-based Full-color Persistent Luminescence in Hybrid Perovskitoids**

Guowei Xiao,<sup>†a</sup> Yu-Juan Ma,<sup>†a</sup> Zhenhong Qi,<sup>a</sup> Xiaoyu Fang,<sup>a</sup> Tianhong Chen <sup>a</sup> and Dongpeng Yan <sup>\*a</sup>

<sup>a</sup> Beijing Key Laboratory of Energy Conversion and Storage Materials and Key Laboratory of Radiopharmaceuticals, Ministry of Education, College of Chemistry, Beijing Normal University, Beijing 100875, P. R. China

E-mail: [yandp@bnu.edu.cn](mailto:yandp@bnu.edu.cn)

<sup>†</sup> These authors contributed equally to this work.

## Contents

### Experimental Section

Figure S1. IR plots of (a) **CdX-apim1** and (b) **CdX-apim2** (X = Cl, Br).

Figure S2. The structure of **CdCl-apim2** along *c* axis, in which green and blue dashed represent N-H...Cl and C-H... $\pi$  interactions, respectively.

Figure S3. The PXRD plots for **CdCl-apim1** (a) and **CdBr-apim1** (b).

Figure S4. The PXRD plots for **CdCl-apim2** (a) and **CdBr-apim2** (b).

Figure S5. TGA plots of (a) **CdX-apim1** and (b) **CdX-apim2** (X = Cl, Br).

Figure S6. The excitation and emission spectra of **CdCl-apim1** (a) and **CdBr-apim1** (b).

Figure S7. Quantum yields of **CdX-apim1** under 330 nm UV light excitation.

Figure S8. Prompt emission spectra of apim in water and EtOH solutions.

Figure S9. The excitation wavelength-dependent CIE coordinates in delayed mode for **CdCl-apim1**.

Figure S10. Fluorescence decay profile of **CdBr-apim1**.

Figure S11. (a) Excitation spectra of **CdCl-apim2** monitored at 450 nm and 500 nm; (b) Prompt PL spectra of **CdCl-apim2** under different excitation; (c) CIE chromaticity coordinates in prompt mode with different excitation wavelengths; (d) Fluorescence decay profiles at 450 nm and 500 nm.

Figure S12. Quantum yields of **CdX-apim2** under 405 nm UV light excitation.

Figure S13. The excitation wavelength-dependent CIE coordinates in delayed mode for **CdCl-apim2**.

Figure S14. (a) Excitation spectra of **CdBr-apim2** monitored at 480 nm and 520 nm; (b) Prompt PL spectra of **CdBr-apim2** under different excitation; (c) CIE chromaticity coordinates in prompt mode with different excitation wavelengths; (d) Fluorescence decay profiles at 480 nm and 520 nm.

Figure S15. The excitation wavelength-dependent CIE coordinates in delayed mode for **CdBr-apim2**.

Figure S16. The temperature-dependent emission spectra for **CdBr-apim2** excited by different UV light (Prompt mode).

Figure S17. (a, c, e) The temperature-dependent emission spectra for **CdBr-apim2** excited by different UV light (Delayed mode); (b, d, f) Decay profiles excited by different UV light.

Figure S18. Differential scanning calorimetry (DSC) plots for **CdBr-apim2**.

Figure S19. Distribution maps of the hole and electron in emission processes, for **CdCl-apim1** (Hole, yellow; Electron, cyan).

Figure S20. Distribution maps of the hole and electron in emission processes, for **CdCl-apim2** (Hole, yellow; Electron, cyan).

Figure S21. UV–vis absorption spectra of **CdX-apim1** and **CdX-apim2**.

Figure S22. Images of **CdBr-apim2** immersed in acetonitrile before and after turning off the 365 nm UV lamp.

Table S1. Crystallographic data for **CdCl-apim1** and **CdBr-apim1**.

Table S2. Selected bond lengths (Å) and angles (°) for **CdCl-apim1** and **CdBr-apim1** at 100 K.

Table S3. Crystallographic data for **CdCl-apim2** and **CdBr-apim2**.

Table S4. Continuous shape measure (CShM) analyses of geometries for Cd1 in compounds **CdCl-apim2** and **CdBr-apim2** by SHAPE 2.0 Software.

Table S5. Selected bond lengths (Å) and angles (°) for **CdCl-apim2** at different temperatures.

Table S6. Selected bond lengths (Å) and angles (°) for **CdBr-apim2** at different temperatures.

Table S7. The fitting parameters for fluorescence lifetimes at room temperature.

Table S8. The fitting parameters for phosphorescence lifetimes.

## Experimental Section

### Materials and methods

All chemicals were purchased from Beijing Innochem Science&Technology Co. Ltd. and used directly (analytical grade). All photoluminescence (PL) spectra and decay profiles were recorded on an FLS 980 fluorescence spectrometer, and the temperature-dependent PL spectra and decay curves were exported during the heating process. The UV lamp used to take photos for fluorescence and afterglow photos is 2 W. IR spectra were exported on a Shimadzu IRAffinity-1 FT-IR spectrometer using KBr pellet. Thermogravimetric analysis was carried out using a powder sample with a heating rate of 10 °C K<sup>-1</sup> under N<sub>2</sub> atmosphere on a NETZSCH STA449 F5 synchronous thermal analyzer. The differential scanning calorimetry data were tested with a Mettler differential scanning calorimetry. The absorption spectra were measured on a Puxi Tu-1901 spectrophotometer using BaSO<sub>4</sub> as reference. Powder X-ray diffraction (PXRD) data were recorded on a Shimadzu XRD-7000 (3KW) X-ray diffractometer. Simulated curves of PXRD were exported by diffraction-crystal module of the Mercury (Hg) program using the single-crystal data.

### Synthetic procedures

**Synthesis of CdCl-apim1.** 0.20 mmol CdCl<sub>2</sub>·2.5H<sub>2</sub>O (0.045 g), 0.40 mmol apim (0.065 mL), 1 mL deionized water, 3 mL ethanol and 0.2 mL concentrated hydrochloric acid were sealed in a Teflon-lined autoclave (20 mL) and heated to 120 °C for 72 hours. Colorless crystals were obtained and washed with absolute ethanol. Yield: ca. 52% based on CdCl<sub>2</sub>·2.5H<sub>2</sub>O.

**Synthesis of CdBr-apim1.** 0.20 mmol CdBr<sub>2</sub>·4H<sub>2</sub>O (0.069 g), 0.40 mmol apim (0.065 mL), 1 mL deionized water, 3 mL EtOH and 0.2 mL concentrated hydrobromic acid were added in a glass bottle (15 mL), then dissolved by ultrasound and evaporated for several days. Colorless crystals were obtained. Yield: ca. 26% based on CdBr<sub>2</sub>·4H<sub>2</sub>O.

**Synthesis of CdCl-apim2.** 0.20 mmol CdCl<sub>2</sub>·2.5H<sub>2</sub>O (0.045 g), 0.80 mmol apim (0.13 mL), 3 mL deionized water, 6 mL acetonitrile and 0.15 mL concentrated hydrochloric acid were sealed in a Teflon-lined autoclave (20 mL) and heated to 120 °C for 72 hours. Colorless crystals were obtained and washed with absolute ethanol. Yield: ca. 38% based on CdCl<sub>2</sub>·2.5H<sub>2</sub>O.

**Synthesis of CdBr-apim2.** 0.20 mmol CdBr<sub>2</sub>·4H<sub>2</sub>O (0.103 g), 0.60 mmol apim (0.095 mL), 5 mL deionized water and 0.05 mL concentrated hydrobromic acid were sealed in a Teflon-lined autoclave (20 mL) and heated to 140 °C for 72 hours. Colorless crystals were obtained and washed with absolute ethanol. Yield: ca. 34% based on CdBr<sub>2</sub>·4H<sub>2</sub>O.

**Preparation of Ink.** CdBr-apim2 is carefully ground and sieved through a 200 mesh screen, and poly(methylmethacrylate) (PMMA) is dissolved in moderate acetonitrile. Then the sieved powders can be mixed with a concentration of CdBr-apim2 at 10%.

### Crystallography.

The single-crystal X-ray diffraction data were collected on a Rigaku XtalLAB Synergy diffractometer with Cu-K $\alpha$  radiation ( $\lambda = 1.54184 \text{ \AA}$ ). SHELX-2016 software was employed to solve and refine the structure.<sup>1</sup> Crystallographic data are listed in Table S1 and S3, while selected bond lengths and angles are listed in Table S2, S4 and S5. Full crystallographic data for perovskitoids has been deposited with the CCDC (2253383-2253388).

### Calculation Details

The density functional theory (DFT) and the time-dependent density functional theory (TDDFT) are performed via CP2K 9.1<sup>2</sup> to optimize the geometries of ground state and excited triplet states of 1D structure and 2D structure using the PBE functional using the DZVP-MOLOPT-SR-GTH basis set for all elements. The D3 Grimme's dispersion term with Becke-Johnson damping is added to the PBE functional to better describe the intramolecular non-covalent interactions between the metal-organic complexes. k-point is set by GAMMA only. The input files are generated by Multiwfn<sup>3-5</sup>. Based on calculation result, charge density difference is calculated by Multiwfn and graphs are analyzed by VESTA<sup>6</sup>.

## References

- 1 G. M. Sheldrick, *Acta Crystallogr. C*, 2015, **71**, 3–8.
- 2 T. D. Kühne, M. Iannuzzi, M. Del Ben, V. V. Rybkin, P. Seewald, F. Stein, T. Laino, R. Z. Khaliullin, O. Schütt, F. Schiffmann, D. Golze, J. Wilhelm, S. Chulkov, M. H. Bani-Hashemian, V. Weber, U. Borštnik, M. Taillefumier, A. S. Jakobovits, A. Lazzaro, H. Pabst, T. Müller, R. Schade, M. Guidon, S. Andermatt, N. Holmberg, G. K. Schenter, A. Hehn, A. Bussy, F. Belleflamme, G. Tabacchi, A. Glöß, M. Lass, I. Bethune, C. J. Mundy, C. Plessl, M. Watkins, J. VandeVondele, M. Krack and J. Hutter, *J. Chem. Phys.*, 2020, **152**, 194103.
- 3 T. Lu and F. Chen, *J. Comput. Chem.*, 2012, **33**, 580–592.
- 4 T. Lu and Q. Chen, *J. Comput. Chem.*, 2022, **43**, 539–555.
- 5 T. Lu and Q. Chen, ChemRxiv. Cambridge: Cambridge Open Engage, 2020.
- 6 K. Momma and F. Izumi, *J. Appl. Crystallogr.*, 2011, **44**, 1272–1276.

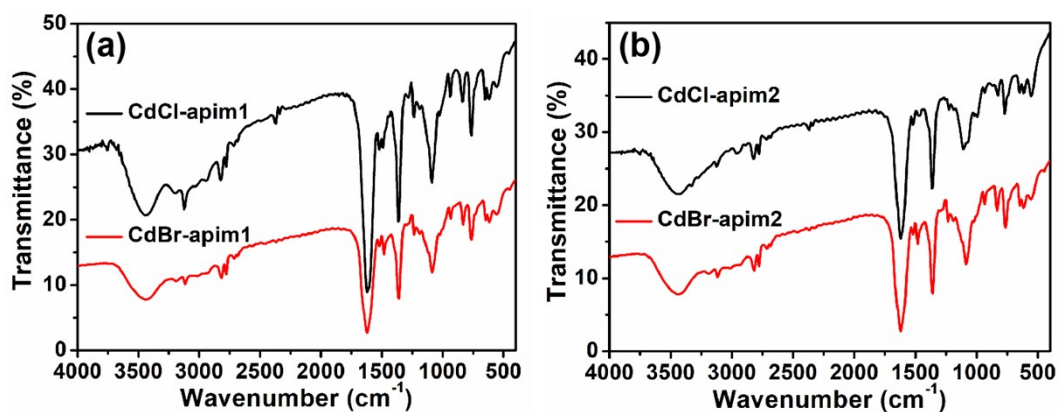

Figure S1. IR plots of (a) CdX-apim1 and (b) CdX-apim2 (X = Cl, Br).

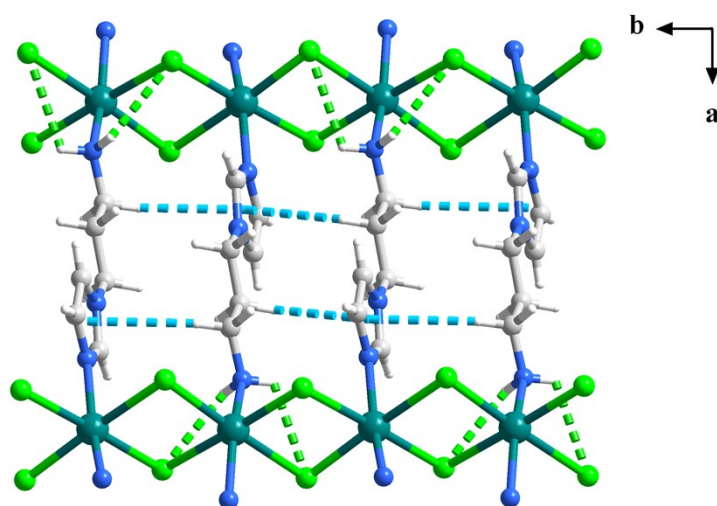

Figure S2. The structure of CdCl-apim2 along c axis, in which green and blue dashed represent N-H...Cl and C-H... $\pi$  interactions, respectively.

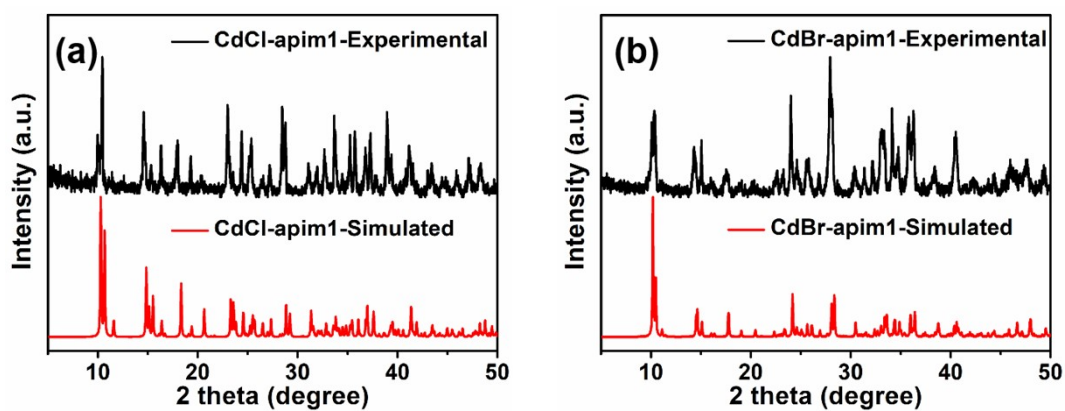

Figure S3. The PXRD plots for CdCl-apim1 (a) and CdBr-apim1 (b).

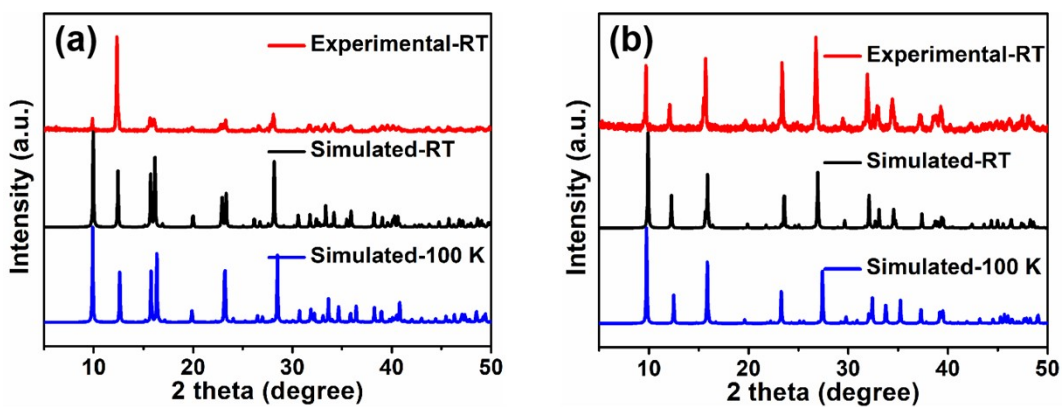

Figure S4. The PXRD plots for CdCl-apim2 (a) and CdBr-apim2 (b).

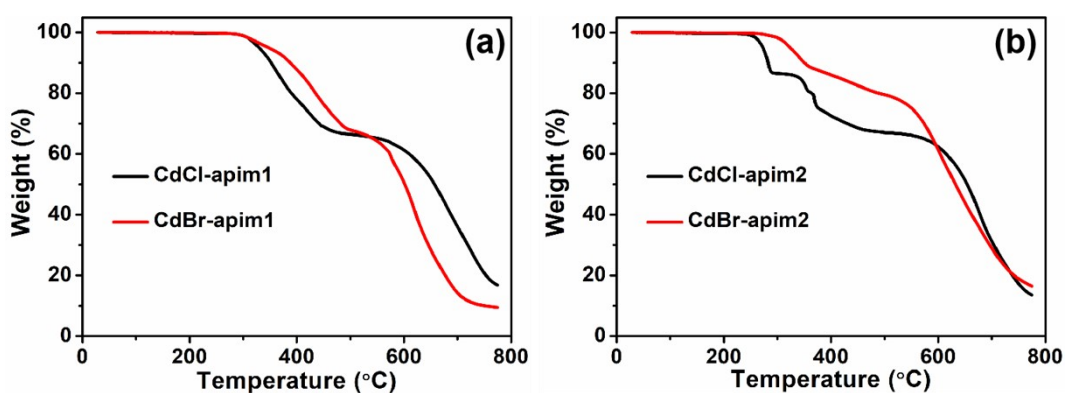

Figure S5. TGA plots of (a) CdX-apim1 and (b) CdX-apim2 (X = Cl, Br).

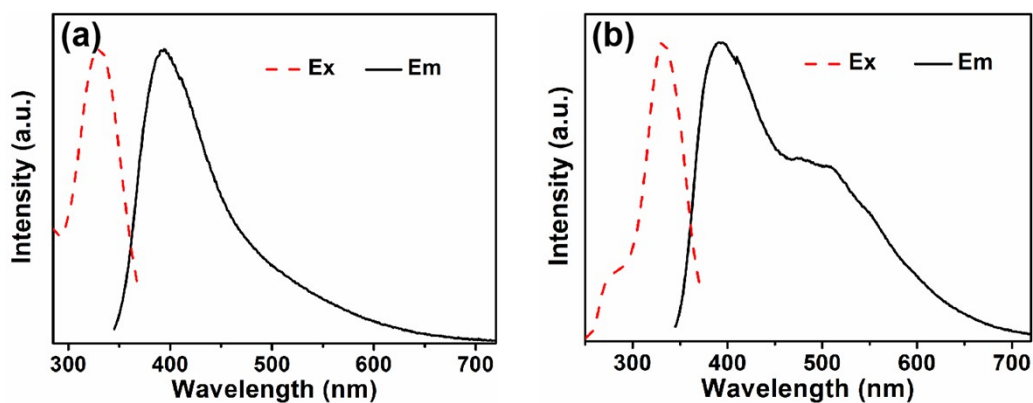

Figure S6. The excitation and emission spectra of CdCl-apim1 (a) and CdBr-apim1 (b).

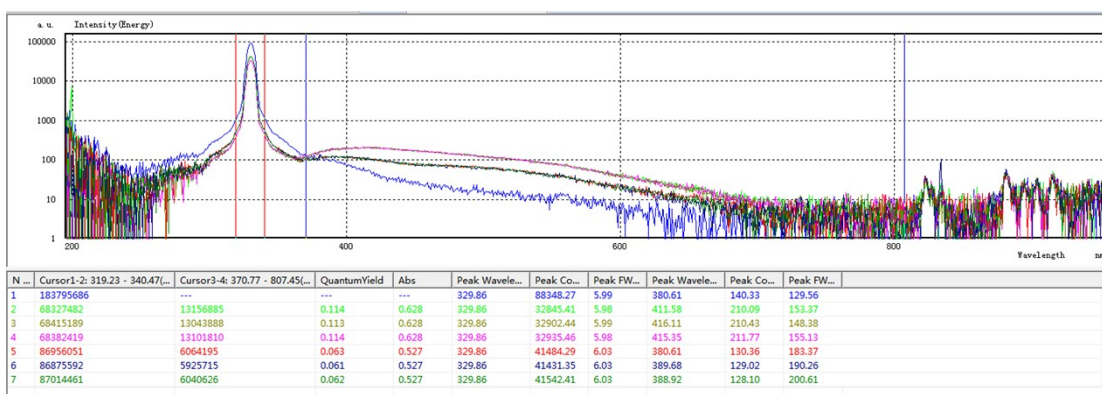

Figure S7. Quantum yields of CdX-apim1 under 330 nm UV light excitation (1 for background; 2-4 for CdCl-apim1; 5-7 for CdBr-apim1).

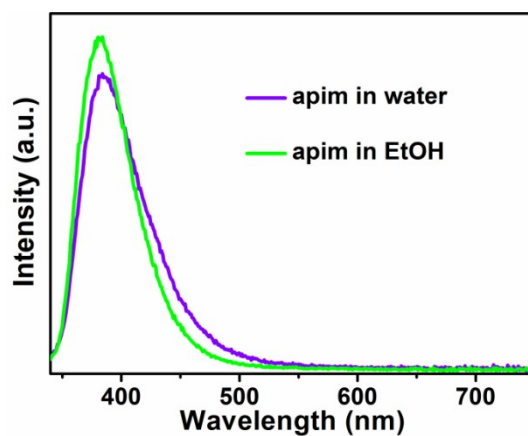

Figure S8. Prompt emission spectra of apim in water and EtOH solutions.

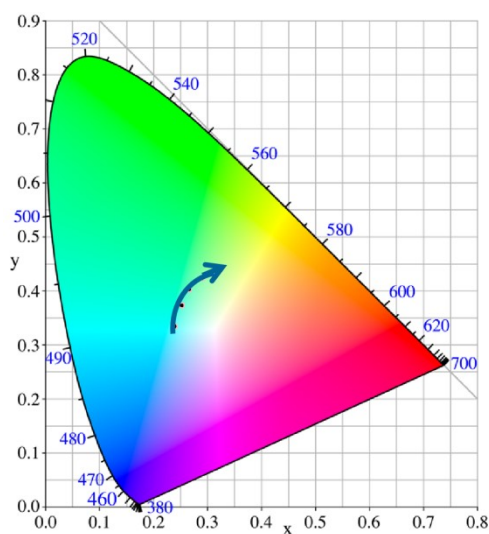

Figure S9. The excitation wavelength-dependent CIE coordinates in delayed mode for CdCl-apim1.



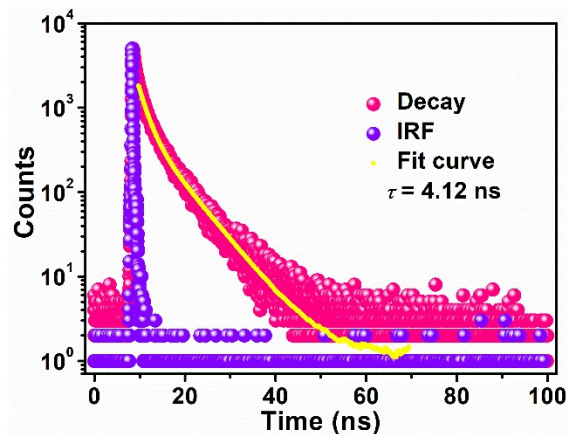

Figure S10. Fluorescence decay profile of CdBr-apim1.

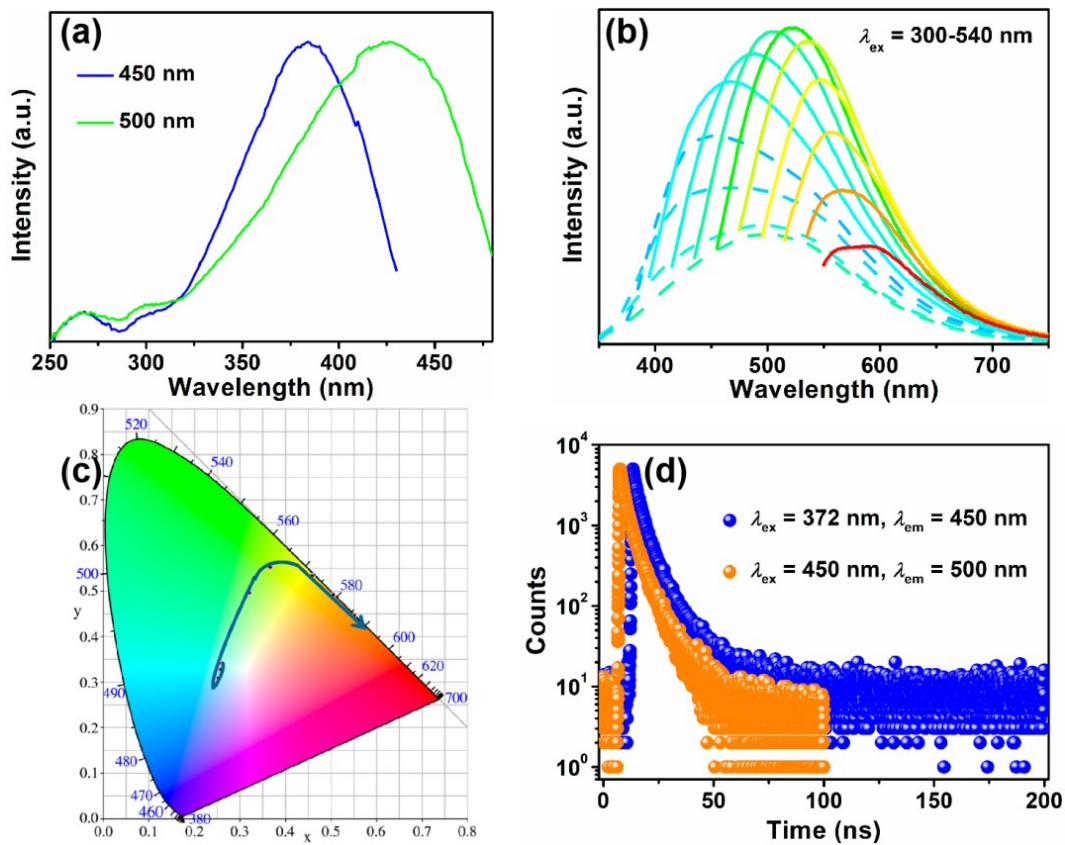

Figure S11. (a) Excitation spectra of CdCl-apim2 monitored at 450 nm and 500 nm; (b,c) Prompt PL spectra and CIE coordinates of CdCl-apim2 under different excitations; (d) Fluorescence decay profiles at 450 nm and 500 nm.

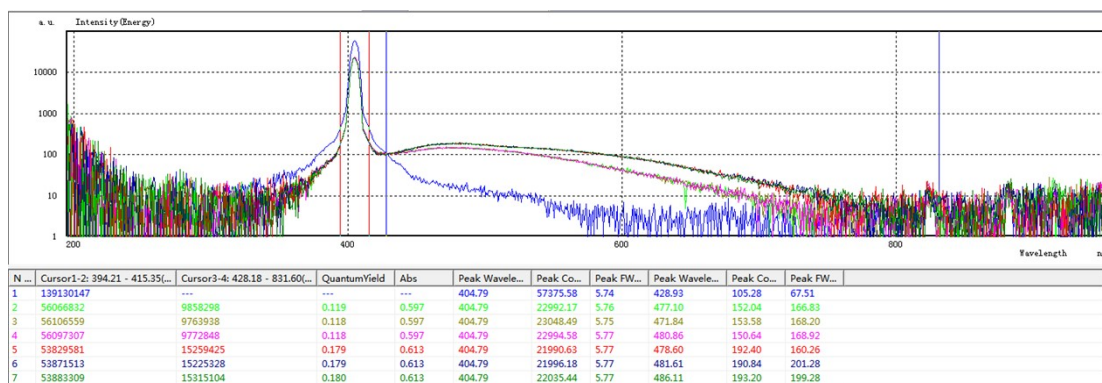

Figure S12. Quantum yields of CdX-apim2 under 405 nm UV light excitation (1 for background; 2-4 for CdCl-apim2; 5-7 for CdBr-apim2).

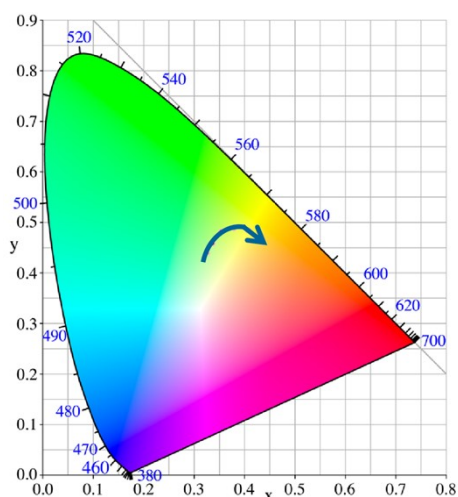

Figure S13. The excitation wavelength-dependent CIE coordinates in delayed mode for CdCl-apim2.

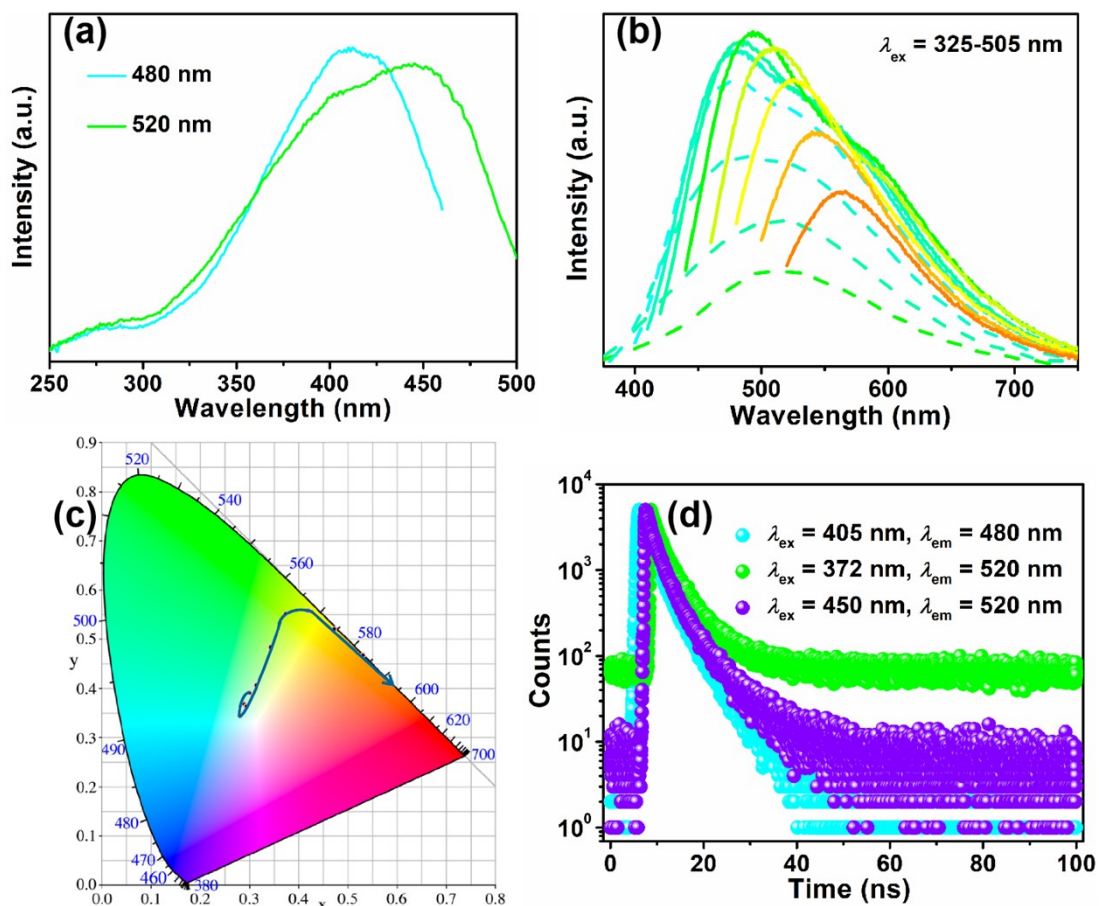

**Figure S14.** (a) Excitation spectra of CdBr-apim2 monitored at 480 nm and 520 nm; (b, c) Prompt PL spectra and CIE coordinates of CdBr-apim2 under different excitations; (d) Fluorescence decay profiles at 480 nm and 520 nm.

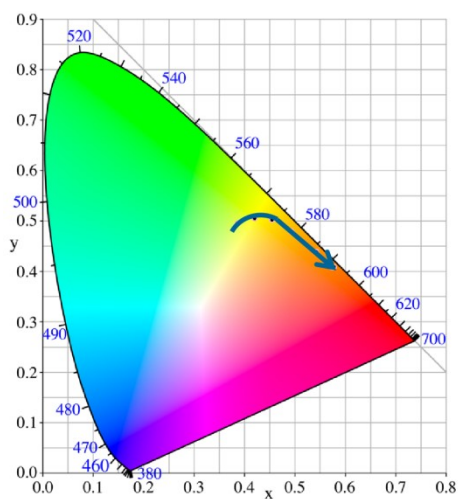

**Figure S15.** The excitation wavelength-dependent CIE coordinates in delayed mode for CdBr-apim2.

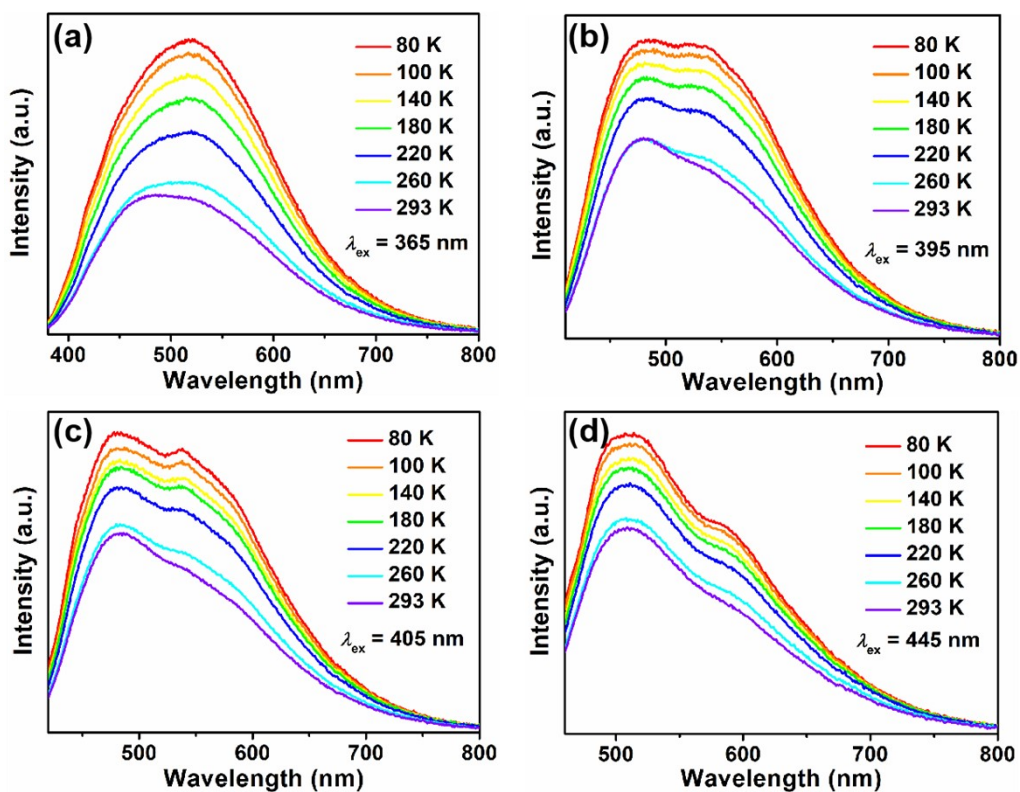

Figure S16 The temperature-dependent emission spectra for CdBr-apim2 excited by different UV lights (Prompt mode).

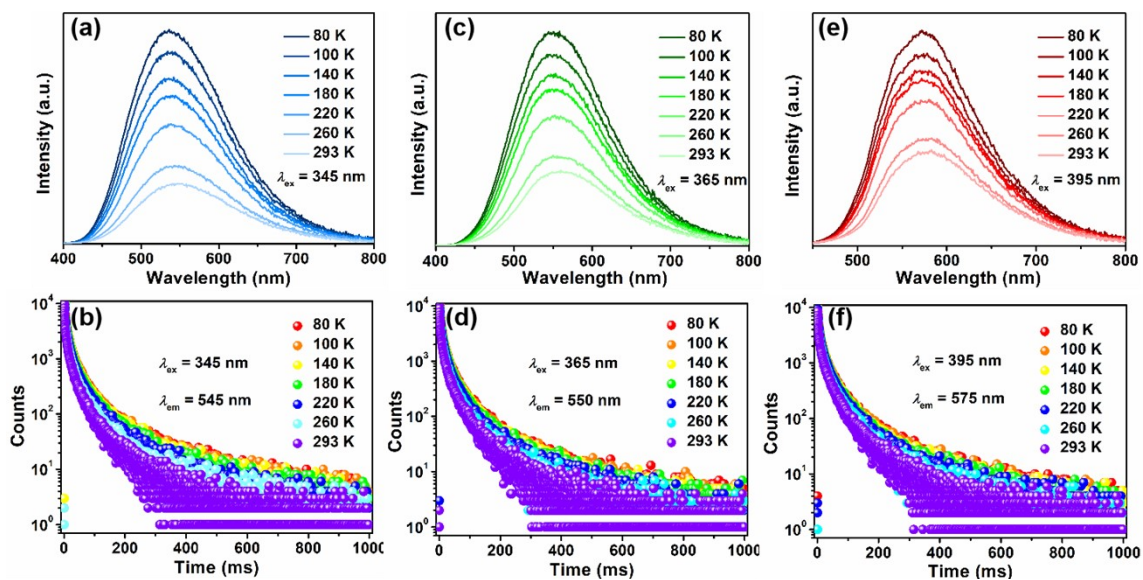

Figure S17. (a, c, e) The temperature-dependent emission spectra for CdBr-apim2 excited by different UV lights (Delayed mode); (b, d, f) Decay profiles excited by different UV lights.



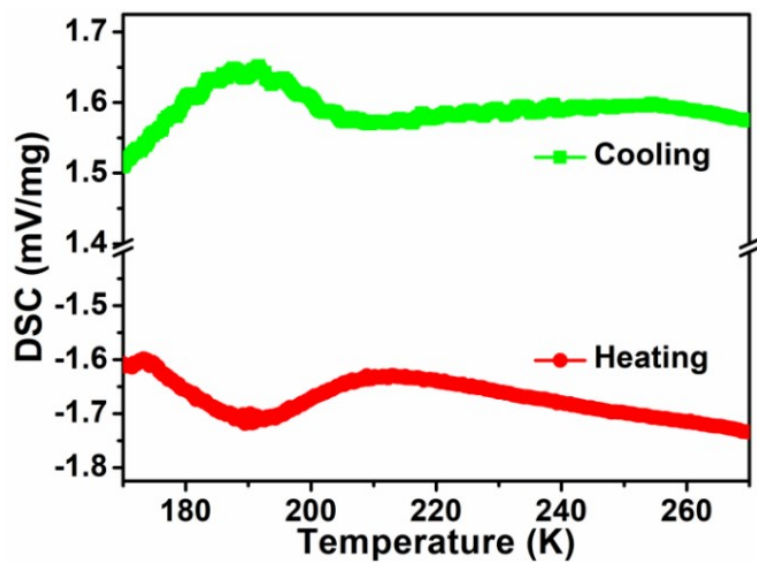

Figure S18. Differential scanning calorimetry (DSC) plots for CdBr-apim2.

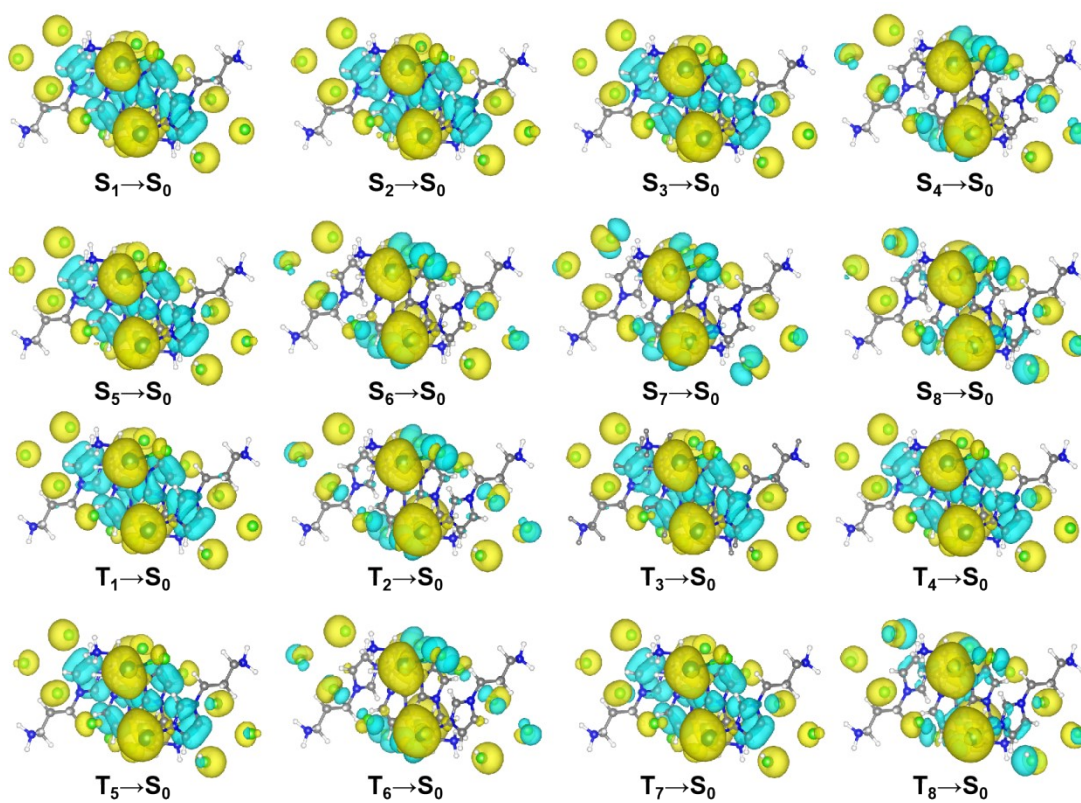

Figure S19. Distribution maps of the hole and electron in emission processes, for CdCl-apim1 (Hole, yellow; Electron, cyan).

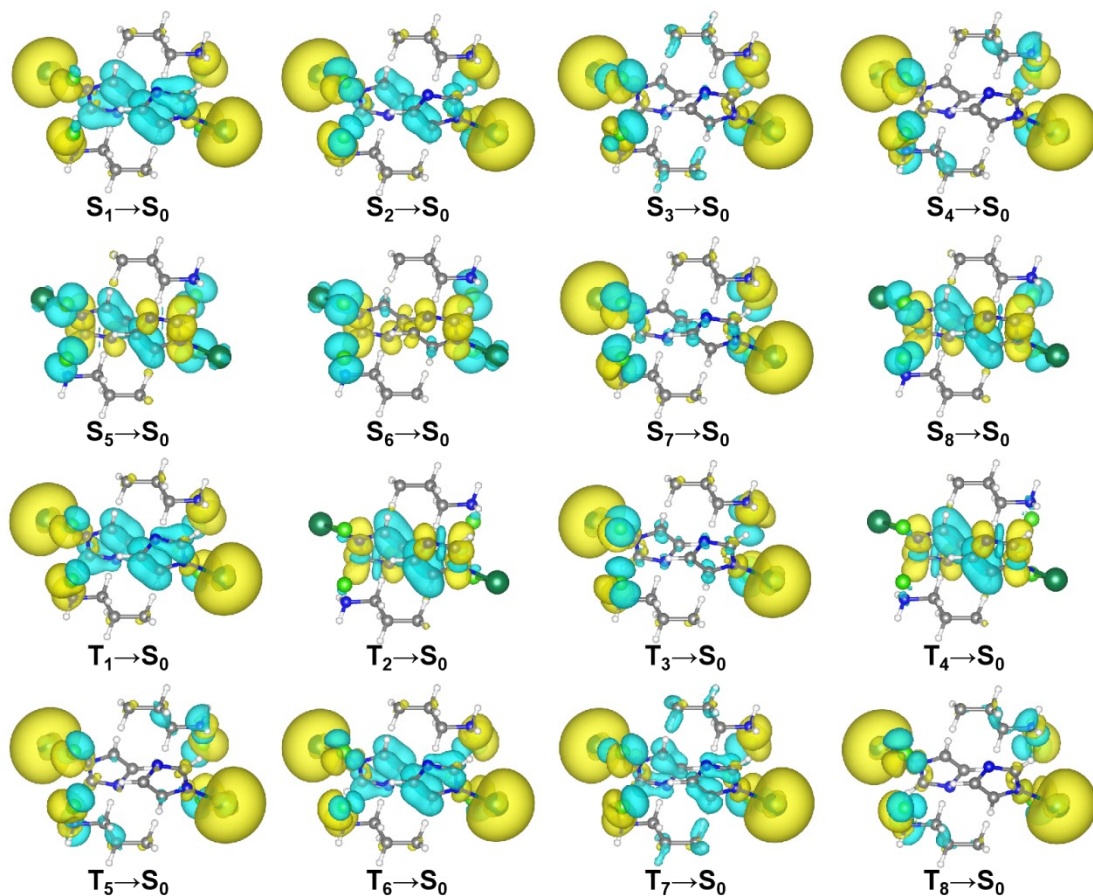

Figure S20. Distribution maps of the hole and electron in emission processes, for CdCl-apim2 (Hole, yellow; Electron, cyan).

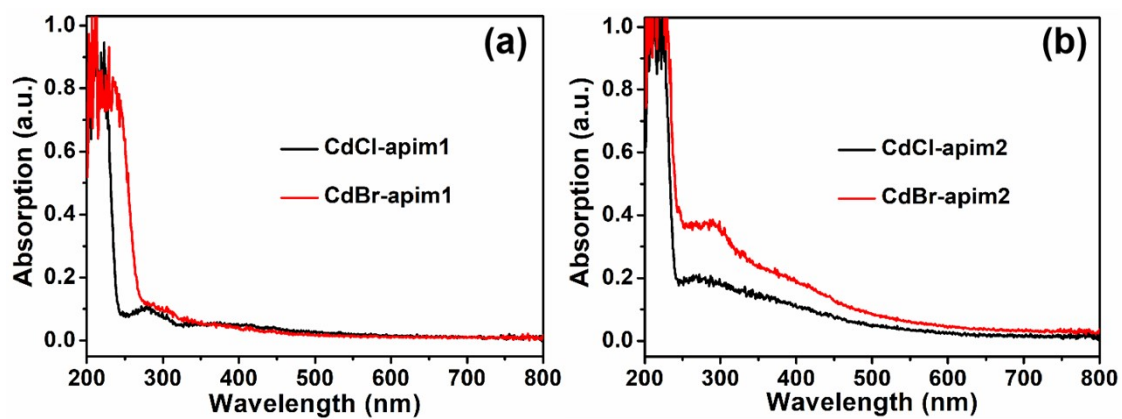

Figure S21. UV-vis absorption spectra of CdX-apim1 and CdX-apim2.

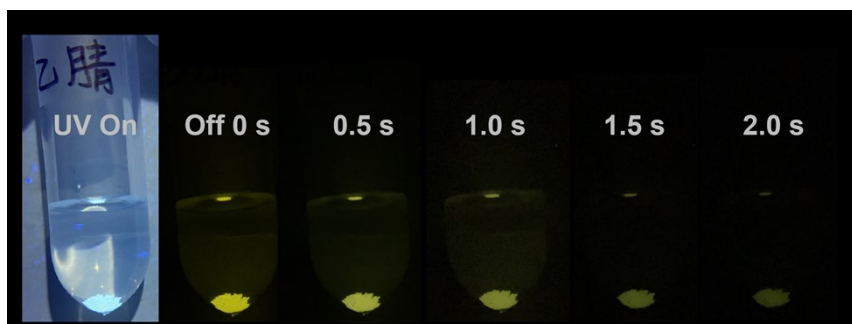

**Figure S22.** Images of CdBBr-apim2 immersed in acetonitrile before and after turning off the 365 nm UV lamp.

**Table S1.** Crystallographic data for **CdCl-apim1** and **CdBr-apim1**.

|                                                                            | <b>CdCl-apim1</b>                                               | <b>CdBr-apim1</b>                                               |
|----------------------------------------------------------------------------|-----------------------------------------------------------------|-----------------------------------------------------------------|
| Formula                                                                    | C <sub>6</sub> H <sub>12</sub> N <sub>3</sub> CdCl <sub>3</sub> | C <sub>6</sub> H <sub>12</sub> N <sub>3</sub> CdBr <sub>3</sub> |
| <i>Mr</i> (g·mol <sup>-1</sup> )                                           | 344.94                                                          | 478.32                                                          |
| Temperature (K)                                                            | 100 K                                                           | 100 K                                                           |
| Space group                                                                | <i>P2/c</i>                                                     | <i>P2/c</i>                                                     |
| Crystal system                                                             | Monoclinic                                                      | Monoclinic                                                      |
| <i>a</i> (Å)                                                               | 7.6542(2)                                                       | 7.99480(10)                                                     |
| <i>b</i> (Å)                                                               | 8.5911(3)                                                       | 8.67360(10)                                                     |
| <i>c</i> (Å)                                                               | 16.6247(5)                                                      | 16.9504(3)                                                      |
| $\alpha$ (°)                                                               | 90                                                              | 90                                                              |
| $\beta$ (°)                                                                | 94.622(3)                                                       | 95.696(2)                                                       |
| $\gamma$ (°)                                                               | 90                                                              | 90                                                              |
| <i>V</i> (Å <sup>3</sup> )                                                 | 1089.65(6)                                                      | 1169.60(3)                                                      |
| <i>Z</i>                                                                   | 4                                                               | 4                                                               |
| <i>F</i> (000)                                                             | 672                                                             | 888                                                             |
| <i>D<sub>c</sub></i> (gcm <sup>-3</sup> )                                  | 2.103                                                           | 2.716                                                           |
| $\mu$ (mm <sup>-1</sup> )                                                  | 22.498                                                          | 26.664                                                          |
| <i>R</i> <sub>int</sub>                                                    | 0.0450                                                          | 0.0738                                                          |
|                                                                            | -9≤ <i>h</i> ≤9                                                 | -10≤ <i>h</i> ≤7                                                |
| limiting indices                                                           | -10≤ <i>k</i> ≤10                                               | -10≤ <i>k</i> ≤10                                               |
|                                                                            | -20≤ <i>l</i> ≤16                                               | -20≤ <i>l</i> ≤20                                               |
| Collected reflections                                                      | 12133                                                           | 13387                                                           |
| Unique reflections                                                         | 2249                                                            | 2383                                                            |
| GOF on <i>F</i> <sup>2</sup>                                               | 1.024                                                           | 1.041                                                           |
| <i>R</i> <sub>1</sub> , <i>wR</i> <sub>2</sub> [ <i>I</i> >2σ( <i>I</i> )] | 0.0494 0.1297                                                   | 0.0540 0.1597                                                   |
| <i>R</i> <sub>1</sub> , <i>wR</i> <sub>2</sub> [all data]                  | 0.0497 0.1299                                                   | 0.0550 0.1611                                                   |

$${}^a R_1 = \sum ||F_o| - |F_c|| / \sum |F_o| \quad . \quad {}^b wR_2 = \{ \sum [w(F_o^2 - F_c^2)^2] / \sum w(F_o^2)^2 \}^{1/2}.$$



**Table S2.** Selected bond lengths (Å) and angles (°) for **CdCl-apim1** and **CdBr-apim1** at 100 K.

| <b>CdCl-apim1</b>                                       |            | <b>CdBr-apim1</b>                                       |            |
|---------------------------------------------------------|------------|---------------------------------------------------------|------------|
| Cd(1)-N(1)                                              | 2.253(6)   | Cd(1)-N(1)                                              | 2.253(6)   |
| Cd(1)-Cl(3)                                             | 2.5674(16) | Cd(1)-Br(4)                                             | 2.6901(8)  |
| Cd(1)-Cl(2)                                             | 2.6401(10) | Cd(1)-Br(3)                                             | 2.7881(6)  |
| Cd(1)-Cl(1)                                             | 2.6947(16) | Cd(1)-Br(1)#1                                           | 2.8185(8)  |
| Cd(1)-Cl(1)#1                                           | 2.7043(15) | Cd(1)-Br(1)                                             | 2.8387(8)  |
| Cd(1)-Cl(4)                                             | 2.7157(17) | Cd(1)-Br(2)                                             | 2.8828(9)  |
| <hr/>                                                   |            |                                                         |            |
| N(1)-Cd(1)-Cl(3)                                        | 97.82(15)  | N(1)-Cd(1)-Br(4)                                        | 99.05(15)  |
| N(1)-Cd(1)-Cl(2)                                        | 97.45(15)  | N(1)-Cd(1)-Br(3)                                        | 96.10(16)  |
| Cl(3)-Cd(1)-Cl(2)                                       | 91.50(5)   | Br(4)-Cd(1)-Br(3)                                       | 91.61(2)   |
| N(1)-Cd(1)-Cl(1)                                        | 87.77(15)  | N(1)-Cd(1)-Br(1)#1                                      | 87.25(16)  |
| Cl(3)-Cd(1)-Cl(1)                                       | 171.94(5)  | Br(4)-Cd(1)-Br(1)#1                                     | 92.60(2)   |
| Cl(2)-Cd(1)-Cl(1)                                       | 93.54(4)   | Br(3)-Cd(1)-Br(1)#1                                     | 174.15(2)  |
| N(1)-Cd(1)-Cl(1)#1                                      | 86.10(15)  | N(1)-Cd(1)-Br(1)                                        | 87.30(15)  |
| Cl(3)-Cd(1)-Cl(1)#1                                     | 92.18(5)   | Br(4)-Cd(1)-Br(1)                                       | 172.22(3)  |
| Cl(2)-Cd(1)-Cl(1)#1                                     | 174.50(4)  | Br(3)-Cd(1)-Br(1)                                       | 92.18(2)   |
| Cl(1)-Cd(1)-Cl(1)#1                                     | 82.37(5)   | Br(1)#1-Cd(1)-Br(1)                                     | 83.16(3)   |
| N(1)-Cd(1)-Cl(4)                                        | 163.21(15) | N(1)-Cd(1)-Br(2)                                        | 164.96(15) |
| Cl(3)-Cd(1)-Cl(4)                                       | 92.68(5)   | Br(4)-Cd(1)-Br(2)                                       | 91.63(2)   |
| Cl(2)-Cd(1)-Cl(4)                                       | 95.33(5)   | Br(3)-Cd(1)-Br(2)                                       | 94.15(2)   |
| Cl(1)-Cd(1)-Cl(4)                                       | 80.59(4)   | Br(1)#1-Cd(1)-Br(2)                                     | 81.67(2)   |
| Cl(1)#1-Cd(1)-Cl(4)                                     | 80.42(4)   | Br(1)-Cd(1)-Br(2)                                       | 81.32(2)   |
| <hr/>                                                   |            |                                                         |            |
| Symmetry codes: #1: -x, y, -z+1/2; #2: -x+1, y, -z+1/2. |            | Symmetry codes: #1: -x, y, -z+1/2; #2: -x+1, y, -z+1/2. |            |

**Table S3.** Crystallographic data for **CdCl-apim2** and **CdBr-apim2**.

|                                                                             | <b>CdCl-apim2</b>       |                         | <b>CdBr-apim2</b>       |                         |        |        |        |        |
|-----------------------------------------------------------------------------|-------------------------|-------------------------|-------------------------|-------------------------|--------|--------|--------|--------|
| Formula                                                                     | $C_6H_{11}N_3CdCl_2$    | $C_6H_{11}N_3CdCl_2$    | $C_6H_{11}N_3CdBr_2$    | $C_6H_{11}N_3CdBr_2$    |        |        |        |        |
| <i>Mr</i> (g·mol <sup>-1</sup> )                                            | 308.48                  | 308.48                  | 397.40                  | 397.40                  |        |        |        |        |
| Temperature (K)                                                             | 100 K                   | 282 K                   | 100 K                   | 282 K                   |        |        |        |        |
| Space group                                                                 | <i>P2<sub>1</sub>/c</i> | <i>P2<sub>1</sub>/m</i> | <i>P2<sub>1</sub>/c</i> | <i>P2<sub>1</sub>/m</i> |        |        |        |        |
| Crystal system                                                              | Monoclinic              | Monoclinic              | Monoclinic              | Monoclinic              |        |        |        |        |
| <i>a</i> (Å)                                                                | 8.9307(3)               | 7.1135(3)               | 9.0513(2)               | 7.2184(2)               |        |        |        |        |
| <i>b</i> (Å)                                                                | 7.6716(2)               | 7.7569(3)               | 8.0055(2)               | 8.1651(2)               |        |        |        |        |
| <i>c</i> (Å)                                                                | 14.0159(4)              | 8.8801(4)               | 14.1660(3)              | 8.9205(2)               |        |        |        |        |
| $\alpha$ (°)                                                                | 90                      | 90                      | 90                      | 90                      |        |        |        |        |
| $\beta$ (°)                                                                 | 92.145(3)               | 91.575(3)               | 90.092(2)               | 90.782(2)               |        |        |        |        |
| $\gamma$ (°)                                                                | 90                      | 90                      | 90                      | 90                      |        |        |        |        |
| <i>V</i> (Å <sup>3</sup> )                                                  | 959.60(5)               | 489.81(4)               | 1026.47(4)              | 525.72(2)               |        |        |        |        |
| <i>Z</i>                                                                    | 4                       | 2                       | 4                       | 2                       |        |        |        |        |
| <i>F</i> (000)                                                              | 600                     | 300                     | 744                     | 372                     |        |        |        |        |
| <i>D<sub>c</sub></i> (gcm <sup>-3</sup> )                                   | 2.135                   | 2.092                   | 2.572                   | 2.510                   |        |        |        |        |
| $\mu$ (mm <sup>-1</sup> )                                                   | 22.945                  | 22.476                  | 25.784                  | 25.172                  |        |        |        |        |
| <i>R</i> <sub>int</sub>                                                     | 0.0832                  | 0.0551                  | 0.0436                  | 0.0400                  |        |        |        |        |
| limiting indices                                                            | -11 ≤ <i>h</i> ≤ 11     | -9 ≤ <i>h</i> ≤ 8       | -11 ≤ <i>h</i> ≤ 11     | -8 ≤ <i>h</i> ≤ 7       |        |        |        |        |
|                                                                             | -9 ≤ <i>k</i> ≤ 9       | -9 ≤ <i>k</i> ≤ 9       | -9 ≤ <i>k</i> ≤ 10      | -10 ≤ <i>k</i> ≤ 10     |        |        |        |        |
|                                                                             | -17 ≤ <i>l</i> ≤ 17     | -10 ≤ <i>l</i> ≤ 10     | -15 ≤ <i>l</i> ≤ 17     | -11 ≤ <i>l</i> ≤ 11     |        |        |        |        |
| Collected reflections                                                       | 10184                   | 4332                    | 11210                   | 5187                    |        |        |        |        |
| Unique reflections                                                          | 1955                    | 1062                    | 2100                    | 1137                    |        |        |        |        |
| GOF on <i>F</i> <sup>2</sup>                                                | 1.052                   | 1.042                   | 1.048                   | 1.028                   |        |        |        |        |
| <i>R</i> <sub>1</sub> , <i>wR</i> <sub>2</sub> [ <i>I</i> > 2σ( <i>I</i> )] | 0.0600                  | 0.1885                  | 0.0641                  | 0.1819                  | 0.0524 | 0.1518 | 0.0494 | 0.1429 |
| <i>R</i> <sub>1</sub> , <i>wR</i> <sub>2</sub> [all data]                   | 0.0616                  | 0.1893                  | 0.0664                  | 0.1906                  | 0.0533 | 0.1522 | 0.0502 | 0.1437 |

$${}^a R_1 = \sum ||F_o| - |F_c| | / \sum |F_o| \quad . \quad {}^b wR_2 = \{ \sum [w(F_o^2 - F_c^2)^2] / \sum w(F_o^2)^2 \}^{1/2}.$$

**Table S4.** Continuous Shape Measure (CShM) analyses of geometries for Cd1 in compounds **CdCl-apim2** and**CdBr-apim2** by SHAPE 2.0 Software.

| Geometry                                  | <b>CdCl-apim2-</b> | <b>CdCl-apim2-</b> | <b>CdBr-apim2-</b> | <b>CdBr-apim2-</b> |
|-------------------------------------------|--------------------|--------------------|--------------------|--------------------|
|                                           | <b>100K-Cd1</b>    | <b>282K-Cd1</b>    | <b>100K-Cd1</b>    | <b>282K-Cd1</b>    |
| Hexagon( $D_{6h}$ )                       | 31.937             | 31.673             | 32.473             | 32.031             |
| Pentagonal pyramid( $C_{5v}$ )            | 23.643             | 23.411             | 23.679             | 23.435             |
| Octahedron( $O_h$ )                       | 1.179              | 1.309              | 1.627              | 1.891              |
| Trigonal prism( $D_{3h}$ )                | 14.177             | 14.304             | 14.761             | 15.047             |
| Johnson pentagonal pyramid J2( $C_{5v}$ ) | 26.547             | 26.216             | 26.160             | 25.779             |

**Table S5.** Selected bond lengths (Å) and angles (°) for **CdCl-apim2** at different temperatures.

| <b>100 K</b>           |          | <b>282 K</b>           |            |
|------------------------|----------|------------------------|------------|
| Cd(1)-N(1)             | 2.284(8) | Cd(1)-N(1)             | 2.272(8)   |
| Cd(1)-N(3)#1           | 2.298(9) | Cd(1)-N(3)#1           | 2.298(10)  |
| Cd(1)-Cl(1)            | 2.586(2) | Cd(1)-Cl(1)            | 2.5844(19) |
| Cd(1)-Cl(2)#2          | 2.601(2) | Cd(1)-Cl(1)#2          | 2.5844(19) |
| Cd(1)-Cl(2)            | 2.775(2) | Cd(1)-Cl(1)#3          | 2.829(2)   |
| Cd(1)-Cl(1)#2          | 2.787(2) | Cd(1)-Cl(1)#4          | 2.829(2)   |
| Cd(1)-Cd(1) intrachain | 3.846    | Cd(1)-Cd(1) intrachain | 3.893      |
| Cd(1)-Cd(1) interchain | 11.560   | Cd(1)-Cd(1) interchain | 11.530     |
| N(1)-Cd(1)-N(3)#1      | 159.6(3) | N(1)-Cd(1)-N(3)#1      | 158.0(4)   |
| N(1)-Cd(1)-Cl(1)       | 98.8(2)  | N(1)-Cd(1)-Cl(1)       | 97.99(17)  |
| N(3)#1-Cd(1)-Cl(1)     | 97.1(2)  | N(3)#1-Cd(1)-Cl(1)     | 97.00(17)  |
| N(1)-Cd(1)-Cl(2)#2     | 96.6(2)  | N(1)-Cd(1)-Cl(1)#2     | 97.99(17)  |
| N(3)#1-Cd(1)-Cl(2)#2   | 95.3(2)  | N(3)#1-Cd(1)-Cl(1)#2   | 97.00(18)  |
| Cl(1)-Cd(1)-Cl(2)#2    | 92.91(7) | Cl(1)-Cd(1)-Cl(1)#2    | 93.90(8)   |
| N(1)-Cd(1)-Cl(2)       | 87.7(2)  | N(1)-Cd(1)-Cl(1)#3     | 86.60(18)  |

|                       |           |                       |           |
|-----------------------|-----------|-----------------------|-----------|
| N(3)#1-Cd(1)-Cl(2)    | 79.9(2)   | N(3)#1-Cd(1)-Cl(1)#3  | 77.83(18) |
| Cl(1)-Cd(1)-Cl(2)     | 88.52(7)  | Cl(1)-Cd(1)-Cl(1)#3   | 88.14(6)  |
| Cl(2)#2-Cd(1)-Cl(2)   | 175.22(4) | Cl(1)#2-Cd(1)-Cl(1)#3 | 174.66(3) |
| N(1)-Cd(1)-Cl(1)#2    | 85.9(2)   | N(1)-Cd(1)-Cl(1)#4    | 86.60(18) |
| N(3)#1-Cd(1)-Cl(1)#2  | 77.9(2)   | N(3)#1-Cd(1)-Cl(1)#4  | 77.83(18) |
| Cl(1)-Cd(1)-Cl(1)#2   | 175.05(3) | Cl(1)-Cd(1)-Cl(1)#4   | 174.66(3) |
| Cl(2)#2-Cd(1)-Cl(1)#2 | 87.97(7)  | Cl(1)#2-Cd(1)-Cl(1)#4 | 88.13(6)  |
| Cl(2)-Cd(1)-Cl(1)#2   | 90.22(7)  | Cl(1)#3-Cd(1)-Cl(1)#4 | 89.42(8)  |

Symmetry codes: #1:  $x-1, -y+1/2, z+1/2$ ; #2:  $-x,$

$y+1/2, -z+3/2$ ; #3:  $-x, y-1/2, -z+3/2$ ; #4:  $x+1, -$  Symmetry codes: #1:  $x+1, y, z-1$ ; #2:  $x, -y+1/2, z,$

$y+1/2, z-1/2.$

#3:  $-x+1, -y+1, -z$ ; #4:  $-x+1, y-1/2, -z$ ; #5:  $x-1, y, z+1.$

**Table S6.** Selected bond lengths (Å) and angles (°) for **CdBr-apim2** at different temperatures.

| 100 K                  |            | 282 K                  |           |
|------------------------|------------|------------------------|-----------|
| Cd(1)-N(1)             | 2.268(7)   | Cd(1)-N(1)             | 2.258(7)  |
| Cd(1)-N(3)#1           | 2.272(8)   | Cd(1)-N(3)#1           | 2.261(10) |
| Cd(1)-Br(1)            | 2.7137(10) | Cd(1)-Br(1)#2          | 2.7146(9) |
| Cd(1)-Br(2)#2          | 2.7364(10) | Cd(1)-Br(1)#3          | 2.7146(9) |
| Cd(1)-Br(2)            | 2.9159(10) | Cd(1)-Br(1)#4          | 3.0229(9) |
| Cd(1)-Br(1)#2          | 2.9494(10) | Cd(1)-Br(1)            | 3.0230(9) |
| Cd(1)-Cd(1) intrachain | 4.102      | Cd(1)-Cd(1) intrachain | 4.101     |
| Cd(1)-Cd(1) interchain | 11.507     | Cd(1)-Cd(1) interchain | 11.398    |
| N(1)-Cd(1)-N(3)#1      | 159.1(3)   | N(1)-Cd(1)-N(3)#1      | 156.7(3)  |
| N(1)-Cd(1)-Br(1)       | 98.9(2)    | N(1)-Cd(1)-Br(1)#2     | 98.03(13) |
| N(3)#1-Cd(1)-Br(1)     | 98.3(2)    | N(3)#1-Cd(1)-Br(1)#2   | 97.84(18) |
| N(1)-Cd(1)-Br(2)#2     | 96.09(19)  | N(1)-Cd(1)-Br(1)#3     | 98.03(13) |
| N(3)#1-Cd(1)-Br(2)#2   | 95.2(2)    | N(3)#1-Cd(1)-Br(1)#3   | 97.84(17) |

|                       |           |                       |           |
|-----------------------|-----------|-----------------------|-----------|
| Br(1)-Cd(1)-Br(2)#2   | 91.59(3)  | Br(1)#2-Cd(1)-Br(1)#3 | 93.59(4)  |
| N(1)-Cd(1)-Br(2)      | 87.53(19) | N(1)-Cd(1)-Br(1)#4    | 86.12(14) |
| N(3)#1-Cd(1)-Br(2)    | 80.7(2)   | N(3)#1-Cd(1)-Br(1)#4  | 77.28(18) |
| Br(1)-Cd(1)-Br(2)     | 89.88(3)  | Br(1)#2-Cd(1)-Br(1)#4 | 174.79(2) |
| Br(2)#2-Cd(1)-Br(2)   | 175.84(3) | Br(1)#3-Cd(1)-Br(1)#4 | 88.93(2)  |
| N(1)-Cd(1)-Br(1)#2    | 85.3(2)   | N(1)-Cd(1)-Br(1)      | 86.12(14) |
| N(3)#1-Cd(1)-Br(1)#2  | 77.5(2)   | N(3)#1-Cd(1)-Br(1)    | 77.28(18) |
| Br(1)-Cd(1)-Br(1)#2   | 175.75(2) | Br(1)#2-Cd(1)-Br(1)   | 88.93(2)  |
| Br(2)#2-Cd(1)-Br(1)#2 | 88.74(3)  | Br(1)#3-Cd(1)-Br(1)   | 174.79(2) |
| Br(2)-Cd(1)-Br(1)#2   | 89.50(3)  | Br(1)#4-Cd(1)-Br(1)   | 88.21(3)  |

Symmetry codes: #1: x-1, -y+1/2, z+1/2; #2: -x, y-1/2, -z+1/2; #3: -x, y+1/2, -z+1/2; #4: x+1, -y+1/2, z-1/2.

Symmetry codes: #1: x+1, y, z+1; #2: -x+1, -y, -z+2; #3: -x+1, y+1/2, -z+2; #4: x, -y+1/2, z; #5: x-1, y, z-1.

**Table S7.** The fitting parameters for fluorescence lifetimes at room temperature.

| Compound          | $\lambda_{\text{ex}}$ (nm) | $\lambda_{\text{em}}$ (nm) | $\tau_1$ (ns) | $A_1$ (%) | $\tau_2$ (ns) | $A_2$ (%) | $\langle \tau \rangle$ (ns) | $\chi^2$ |
|-------------------|----------------------------|----------------------------|---------------|-----------|---------------|-----------|-----------------------------|----------|
| <b>CdCl-apim1</b> | 372                        | 395                        | 3.39          | 62.35     | 12.54         | 37.65     | 6.83                        | 1.302    |
| <b>CdBr-apim1</b> | 372                        | 395                        | 1.83          | 52.12     | 6.62          | 47.88     | 4.12                        | 1.065    |
| <b>CdCl-apim2</b> | 372                        | 450                        | 2.59          | 67.54     | 9.41          | 32.46     | 4.80                        | 1.176    |
|                   | 450                        | 500                        | 3.00          | 63.13     | 8.25          | 36.87     | 4.93                        | 1.216    |
| <b>CdBr-apim2</b> | 372                        | 520                        | 2.13          | 37.27     | 5.53          | 62.73     | 4.26                        | 1.104    |
|                   | 405                        | 480                        | 2.36          | 59.09     | 6.17          | 40.91     | 3.92                        | 1.058    |
|                   | 520                        | 520                        | 2.27          | 59.91     | 6.98          | 40.09     | 4.15                        | 1.237    |

**Table S8.** The fitting parameters for phosphorescence lifetimes.

| Compound          | $\lambda_{\text{ex}}$ (nm) | $\lambda_{\text{em}}$ (nm) | T (°C) | $\tau_1$ (ms) | $A_1$ (%) | $\tau_2$ (ms) | $A_2$ (%) | $\langle\tau\rangle$ (ms) | $\chi^2$ |
|-------------------|----------------------------|----------------------------|--------|---------------|-----------|---------------|-----------|---------------------------|----------|
| <b>CdCl-apim1</b> | 300                        | 505                        | 293    | 91.42         | 51.91     | 454.0         | 48.09     | 265.78                    | 1.290    |
| <b>CdBr-apim1</b> | 330                        | 515                        | 293    | 4.57          | 49.95     | 14.5          | 50.05     | 9.52                      | 1.134    |
| <b>CdCl-apim2</b> | 350                        | 540                        | 293    | 111.9         | 46.45     | 517.9         | 53.55     | 329.31                    | 1.280    |
| <b>CdBr-apim2</b> | 345                        | 540                        | 293    | 14.97         | 50.90     | 65.23         | 49.10     | 39.65                     | 1.231    |
|                   |                            |                            | 260    | 16.80         | 51.71     | 75.61         | 48.29     | 45.20                     | 1.299    |
|                   |                            |                            | 220    | 20.89         | 53.18     | 93.59         | 46.82     | 54.93                     | 1.218    |
|                   |                            |                            | 180    | 22.82         | 50.23     | 101.2         | 49.77     | 61.83                     | 1.297    |
|                   |                            |                            | 140    | 23.92         | 51.36     | 101.7         | 48.64     | 64.38                     | 1.299    |
|                   |                            |                            | 100    | 25.58         | 50.89     | 113.2         | 49.11     | 68.61                     | 1.288    |
|                   |                            |                            | 80     | 28.08         | 51.31     | 123.5         | 48.69     | 74.54                     | 1.227    |
|                   | 365                        | 550                        | 293    | 16.85         | 47.84     | 68.49         | 52.16     | 43.79                     | 1.195    |
|                   |                            |                            | 260    | 17.36         | 48.55     | 72.98         | 51.45     | 45.98                     | 1.279    |
|                   |                            |                            | 220    | 19.92         | 52.33     | 87.88         | 47.67     | 52.32                     | 1.259    |
|                   |                            |                            | 180    | 22.21         | 52.25     | 96.68         | 47.75     | 57.77                     | 1.273    |
|                   |                            |                            | 140    | 24.57         | 51.17     | 105.1         | 48.83     | 63.89                     | 1.286    |
|                   |                            |                            | 100    | 24.51         | 52.49     | 110.4         | 47.51     | 65.32                     | 1.278    |
|                   |                            |                            | 80     | 25.39         | 50.33     | 110.4         | 49.67     | 67.61                     | 1.298    |
|                   | 395                        | 575                        | 293    | 19.80         | 48.40     | 72.58         | 51.60     | 47.03                     | 1.211    |
|                   |                            |                            | 260    | 18.90         | 48.45     | 76.39         | 51.55     | 48.54                     | 1.269    |
|                   |                            |                            | 220    | 23.66         | 49.37     | 92.70         | 50.63     | 58.61                     | 1.255    |
|                   |                            |                            | 180    | 24.45         | 51.35     | 98.81         | 48.65     | 60.61                     | 1.293    |
|                   |                            |                            | 140    | 24.18         | 51.64     | 103.8         | 48.36     | 62.68                     | 1.245    |
|                   |                            |                            | 100    | 26.76         | 48.53     | 111.0         | 51.47     | 70.12                     | 1.298    |
|                   |                            |                            | 80     | 27.05         | 51.52     | 115.9         | 48.48     | 70.12                     | 1.257    |
|                   | 405                        | 590                        | 293    | 20.22         | 46.93     | 74.18         | 53.07     | 48.86                     | 1.254    |
